# Supplementary material for: Does the Pareto Principle describe parasite counts in humans? The case of hookworm in pregnant women
Source: bioRxiv or medRxiv preprint supplement (doi:10.1101/2020.12.30.20249036), 2021-01-04
Supplement: Supplementary file [file media-1.pdf]

**S1 Fig. Histogram of egg count per gram of hooks grouped in each study of the systematic review.**

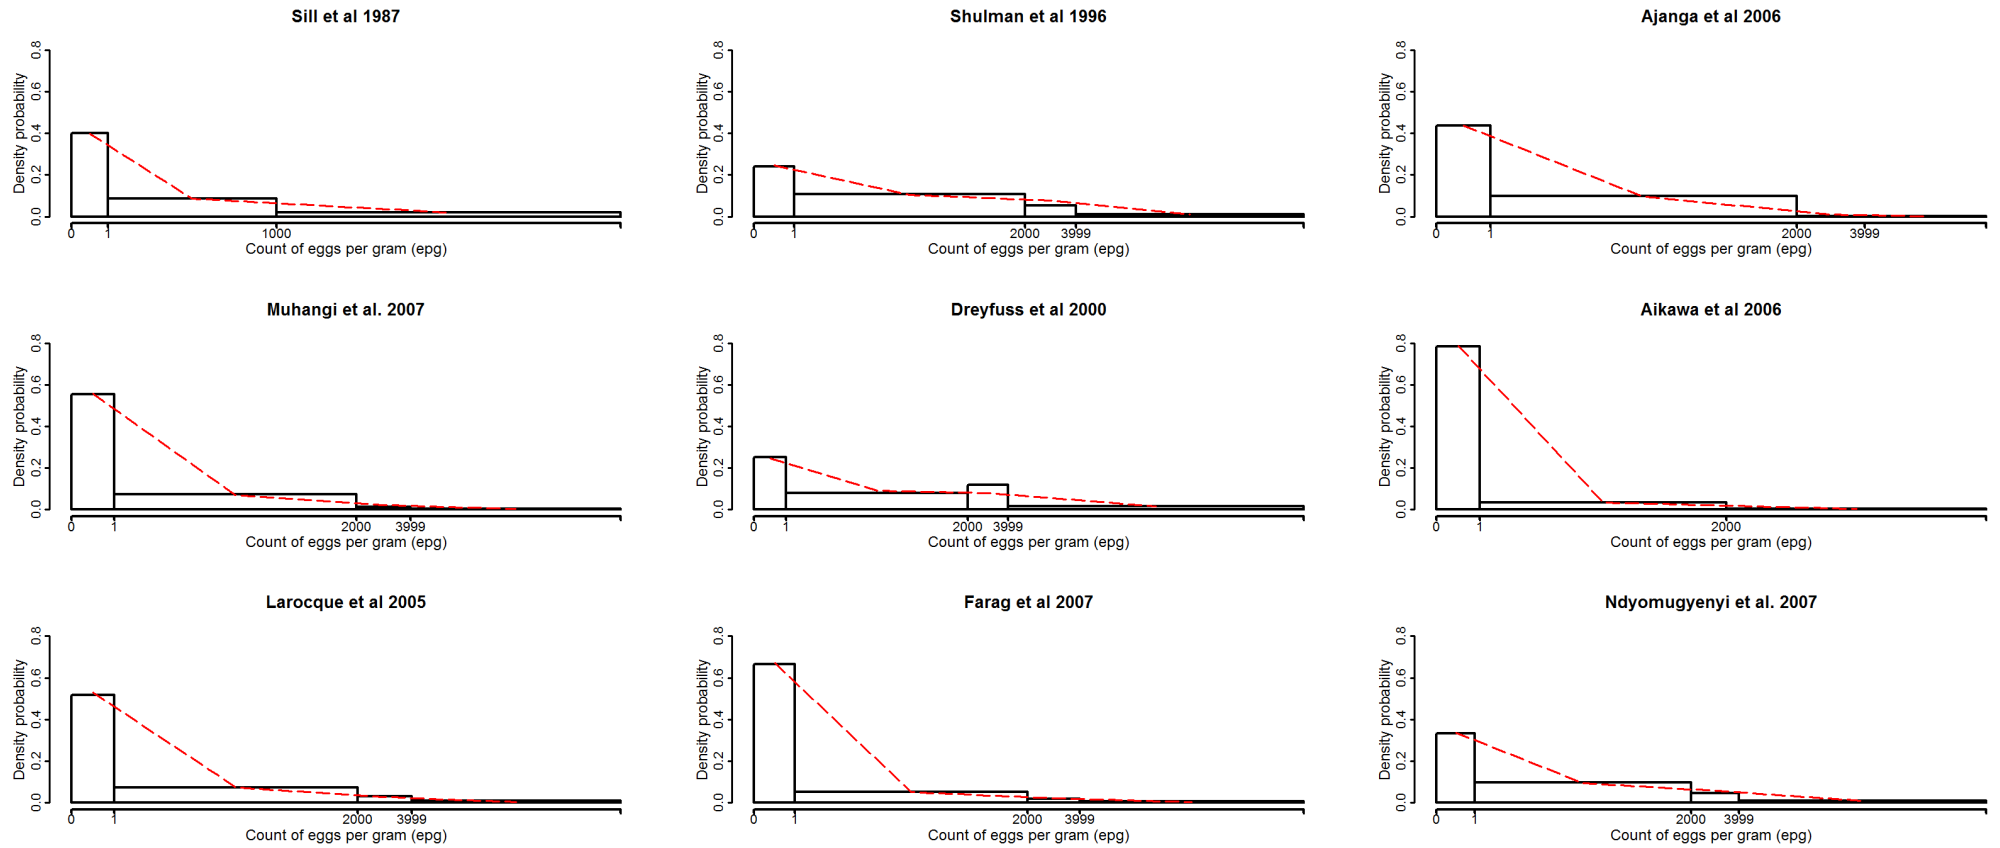

The axis labels show the original values, although the scale was transformed with the fourth root. The cropped line (red) represents the fitted negative binomial distribution
